# Supplementary material for: Machine Learning Assisted Design of Highly Active Peptides for Drug Discovery
Source: PLoS Comput Biol. 2015 Apr 7;11(4):e1004074. doi: 10.1371/journal.pcbi.1004074 (PMC4388847; doi:10.1371/journal.pcbi.1004074)
Supplement: S1 Text — (PDF) [file pcbi.1004074.s001.pdf]

## Supplementary Material For: Machine Learning Assisted Design of Highly Active Peptides for Drug Discovery

Sébastien Giguère<sup>1\*</sup>, François Laviolette<sup>1</sup>, Mario Marchand<sup>1</sup>, Denise Tremblay<sup>2</sup>, Sylvain Moineau<sup>2</sup>, Éric Biron<sup>3</sup>, Xinxia Liang<sup>3</sup> and Jacques Corbeil<sup>4</sup>

**1** Department of Computer Science and Software Engineering, Université Laval, Québec, Canada

**2** Department of Biochemistry, Microbiology and Bioinformatics, Université Laval, Québec, Canada

**3** Faculty of Pharmacy, Université Laval, Québec, Canada

**4** Department of Molecular Medicine, Université Laval, Québec, Canada

\* E-mail: Corresponding [sebastien.giguere.8@ulaval.ca](mailto:sebastien.giguere.8@ulaval.ca)

### Expected outcome of a library given a protocol

The proposed approach makes use of the graph  $G^{h_y}$ , the protocol  $P$ , and a dynamic programming algorithm that exploits recurrences in the factorization of first and second order polynomials. This allows for the efficient computation of  $\tau$  and  $\beta$ , respectively the first and second moment of  $h_y$  when peptides are drawn according to the distribution  $P$ :

$$\begin{aligned}\tau &\stackrel{\text{def}}{=} \sum_{\mathbf{x} \in \mathcal{A}^l} P(\mathbf{x}) \cdot h_y(\mathbf{x}) \\ \beta &\stackrel{\text{def}}{=} \sum_{\mathbf{x} \in \mathcal{A}^l} P(\mathbf{x}) \cdot h_y(\mathbf{x})^2.\end{aligned}$$

Thus, the average and variance predicted bioactivity of peptides synthesized by the protocol are then respectively given by  $\tau$  and  $\beta - \tau^2$ .

To compute these quantities efficiently, the dynamic programming algorithm, given in Algorithm 1, uses the following recurrence relations:

$$\sum_{i=1}^n x_i = x_n + \sum_{i=1}^{n-1} x_i, \quad (1)$$

and

$$\left( \sum_{i=1}^n x_i \right)^2 = \left( \sum_{i=1}^{n-1} x_i \right)^2 + 2x_n \left( \sum_{i=1}^{n-1} x_i \right) + x_n^2. \quad (2)$$

Moreover, each node of the graph  $G^{h_y}$  has the following additional variables.

- $\tau[s, i]$  for the expected length of paths from the source node  $\lambda$  to the node  $(s, i)$ .
- $\beta[s, i]$  for the expected squared length of paths from the source node  $\lambda$  to the node  $(s, i)$ .
- $\rho[s, i]$  is the probability of having the  $k$ -mers  $s$  at position  $i$ .

After the execution of Algorithm 1, the values of  $\tau$  and  $\beta$  are respectively given by  $\tau[t]$  and  $\beta[t]$  for the sink node  $t$ .

---

**Algorithm 1** Algorithm for computing split and pool synthesis statistics using  $G^{h_v}$  and  $\mathcal{P}$

---

$\tau, \beta, \rho$  : arrays with  $n|\mathcal{A}|^k + 2$  entries initialized to 0

```

for all  $s \in \mathcal{A}^k$  do                                      $\triangleright$  Edges leaving the source node
     $\tau[s, 1] \leftarrow \mathcal{P}_1(s_1)W(s, 1)$ 
     $\beta[s, 1] \leftarrow \mathcal{P}_1(s_1)W(s, 1)^2$ 
     $\rho[s, 1] \leftarrow \mathcal{P}_1(s_1)$ 
end for

for  $i = 2 \rightarrow n$  do
    for all  $s \in \mathcal{A}^k$  do
        for all  $a \in \mathcal{A}$  do                                      $\triangleright$  Visiting edge  $((s, i-1), (s', i))$ 
             $s' \leftarrow s_2, \dots, s_k, a$ 
             $\tau[s', i] += \mathcal{P}_i(s_2) \left( \tau[s, i-1] + \rho[s, i-1]W(s', i) \right)$ 
             $\beta[s', i] += \mathcal{P}_i(s_2) \left( \beta[s, i-1] + \rho[s, i-1]W(s', i)^2 + 2\tau[s, i-1]W(s', i) \right)$ 
             $\rho[s', i] += \mathcal{P}_i(s_2)\rho[s, i-1]$ 
        end for
    end for
end for

for all  $s \in \mathcal{A}^k$  do                                      $\triangleright$  Edges heading to the sink node
     $r \leftarrow \prod_{i=1}^{k-1} \mathcal{P}_{n+i}(s_{i+1})$ 
     $\tau[t] += r \left( \tau[s, n] + \rho[s, n]W_t(s) \right)$ 
     $\beta[t] += r \left( \beta[s, n] + \rho[s, n]W_t((s, n), t)^2 + 2\tau[s, n]W_t(s) \right)$ 
     $\rho[t] += r\rho[s, n]$ 
end for

return  $\tau[t], \beta[t] - \tau[t]^2$                                 $\triangleright$  Return average and variance

```

---

## Peptide synthesis, bacterial strains and minimal inhibitory concentration assay

Peptides were synthesized on a Prelude Peptide Synthesizer (Protein Technologies Inc, AZ) using standard Fmoc solid phase peptide chemistry [1]. The synthesis was performed on Rink Amide AM resin and the amino acid couplings achieved with HCTU (2-(6-Chloro-1H-benzotriazole-1-yl)-1,1,3,3-tetramethylaminium hexafluorophosphate) and NMM (N-methylmorpholine). The peptides were cleaved from the resin using a mixture of 95% trifluoroacetic acid, 2.5% triisopropylsilane, 2.5% water for 3h at room temperature and precipitated in cold diethyl ether. After triturating for 2 min, the peptides were collected upon centrifugation and decantation of the ether. The peptides were purified on a Vydac C18 reversed-phase HPLC column ( $22 \times 250$  mm,  $5\mu\text{m}$ ) over 20 min using a linear gradient of 10 – 90% acetonitrile with 0.1% trifluoroacetic acid at a flow rate of 10 mL/min with optical density monitoring at 220 nm. The collected fractions were lyophilised and the identity and purity of the peptides assessed by analytical HPLC and MALDI-TOF mass spectrometry. Peptides were obtained in good yields and with purity greater than 90%.

*Escherichia coli* K12 MG1655 and *Staphylococcus aureus* 68 (HER1049) were obtained from the Félix d’Hérelle Reference Center for Bacterial Viruses of Université Laval (<http://www.phage.ulaval.ca>). Both strains were grown in Trypticase soy broth with agitation at  $37^\circ\text{C}$ . The minimal inhibitory concentration assay was performed as described in [2] and broth microdilution protocol performed in 96-well plates. The bacterial strains were grown overnight at  $37^\circ\text{C}$  with aeration and diluted to a final concentration of  $5 \times 10^5$  cfu/ml in the assay. The peptides were diluted in sterile water and were tested at the following concentrations: 0, 1, 2, 4, 8, 16 and 32  $\mu\text{g}/\text{ml}$ . The optical density (600nm) was followed every 30 minutes for 24 hours with a Synergy 2 plate reader (BioTek Instruments, Inc.).

## References

1. Wellings DA, Atherton E (1997) [4] standard fmoc protocols. *Methods in enzymology* 289: 44–67.
2. Wiegand I, Hilpert K, Hancock RE (2008) Agar and broth dilution methods to determine the minimal inhibitory concentration (mic) of antimicrobial substances. *Nature protocols* 3: 163–175.
